# Supplementary material for: Evaluation of Non-Invasive Sampling Methods for Detection of Hepatitis E Virus Infected Pigs in Pens
Source: MDPI journal article supplement (doi:10.3390/microorganisms11020500), 2023-02-16
Supplement: s1 [file s1]

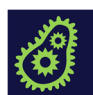

Supplementary Material

**Table S1.** Results of IRS and pooled sampling methods per pen, including both pen status and Cp-value per pooled sample type. (IRS = Individual Rectal Sampling, BS = Boot Sock, FD = Faecal Dropping, P = Pooled Individual Rectal Swabs, OF = Oral Fluid, Undet. = undetected/ Cp-value >40).

| Age category | Pen | Prevalence<br>HEV IRS | Number of<br>pigs sampled | BS | FD | P | OF | BS<br>Cp-value | FD<br>Cp-value | P<br>Cp-value | OF<br>Cp-value |
|--------------|-----|-----------------------|---------------------------|----|----|---|----|----------------|----------------|---------------|----------------|
| 1            | A   | 0.6                   | 20                        | 1  | 1  | 1 | 1  | 31.78          | 36.92          | 33.93         | 35.16          |
| 1            | B   | 0.05                  | 20                        | 1  | 0  | 0 | 1  | 39.32          | Undet.         | Undet.        | 39.67          |
| 1            | C   | 0                     | 20                        | 1  | 0  | 0 | 0  | 36.12          | Undet.         | Undet.        | Undet.         |
| 1            | D   | 0.1                   | 20                        | 1  | 1  | 0 | 0  | 36.61          | 36.83          | Undet.        | Undet.         |
| 1            | E   | 0.1                   | 20                        | 1  | 0  | 0 | 0  | 35.30          | Undet.         | Undet.        | Undet.         |
| 1            | F   | 0                     | 20                        | 0  | 0  | 0 | 0  | Undet.         | Undet.         | Undet.        | Undet.         |
| 1            | G   | 0.1                   | 20                        | 1  | 1  | 1 | 1  | 32.85          | 32.98          | 37.19         | 36.36          |
| 2            | A   | 1                     | 16                        | 1  | 1  | 1 | 1  | 24.52          | 27.49          | 26.97         | 24.01          |
| 2            | B   | 1                     | 15                        | 1  | 1  | 1 | 1  | 23.67          | 23.38          | 27.03         | 26.75          |
| 2            | C   | 1                     | 17                        | 1  | 1  | 1 | 1  | 22.89          | 25.23          | 28.30         | 27.00          |
| 2            | D   | 1                     | 16                        | 1  | 1  | 1 | 1  | 22.94          | 22.93          | 27.15         | 26.04          |
| 2            | E   | 1                     | 16                        | 1  | 1  | 1 | 1  | 22.80          | 22.42          | 26.38         | 24.65          |
| 2            | F   | 1                     | 16                        | 1  | 1  | 1 | 1  | 22.83          | 23.58          | 27.23         | 26.45          |
| 2            | G   | 1                     | 16                        | 1  | 1  | 1 | 1  | 23.01          | 24.97          | 27.08         | 26.25          |
| 3            | A   | 1                     | 15                        | 1  | 1  | 1 | 1  | 21.76          | 23.83          | 27.19         | 26.11          |
| 3            | B   | 0.875                 | 16                        | 1  | 1  | 1 | 1  | 29.09          | 28.92          | 33.28         | 31.25          |
| 3            | C   | 1                     | 15                        | 1  | 1  | 1 | 1  | 23.51          | 24.82          | 28.39         | 26.92          |
| 3            | D   | 1                     | 14                        | 1  | 1  | 1 | 1  | 22.68          | 23.54          | 28.80         | 27.28          |
| 3            | E   | 1                     | 16                        | 1  | 1  | 1 | 1  | 21.43          | 26.70          | 27.63         | 26.35          |
| 3            | F   | 0.933                 | 15                        | 1  | 1  | 1 | 1  | 26.64          | 28.47          | 33.06         | 29.32          |
| 3            | G   | 1                     | 15                        | 1  | 1  | 1 | 1  | 23.28          | 25.70          | 26.82         | 27.51          |
| 4            | A   | 0                     | 12                        | 1  | 0  | 0 | 0  | 37.13          | Undet.         | Undet.        | Undet.         |
| 4            | B   | 0                     | 11                        | 1  | 0  | 0 | 0  | 38.40          | Undet.         | Undet.        | Undet.         |
| 4            | C   | 0                     | 12                        | 1  | 0  | 0 | 1  | 35.15          | Undet.         | Undet.        | 36.79          |
| 4            | D   | 0                     | 12                        | 1  | 0  | 0 | 0  | 38.94          | Undet.         | Undet.        | Undet.         |
| 4            | E   | 0                     | 11                        | 1  | 0  | 0 | 0  | 34.62          | Undet.         | Undet.        | Undet.         |
| 4            | F   | 0                     | 12                        | 0  | 0  | 0 | 0  | Undet.         | Undet.         | Undet.        | Undet.         |
| 4            | G   | 0                     | 11                        | 1  | 0  | 0 | 1  | 38.85          | Undet.         | Undet.        | 39.50          |
